# Supplementary material for: Self-assembly and optically triggered disassembly of hierarchical dendron–virus complexes
Source: Springer Nature journal article supplement (doi:10.1038/nchem.592), 2010-03-21
Supplement: 41557_2010_BFnchem592_MOESM3_ESM.mol [file 41557_2010_BFnchem592_MOESM3_ESM.mol]

  ChemDraw03041005552D

141135  0  0  0  0  0  0  0  0999 V2000
    5.1604    5.2593    0.0000 Cl  0  5  0  0  0  0  0  0  0  0  0  0
    9.0566    3.9701    0.0000 Cl  0  5  0  0  0  0  0  0  0  0  0  0
   12.1163    6.0485    0.0000 Cl  0  5  0  0  0  0  0  0  0  0  0  0
    6.4725    1.2928    0.0000 Cl  0  5  0  0  0  0  0  0  0  0  0  0
    9.9318   -0.2041    0.0000 Cl  0  5  0  0  0  0  0  0  0  0  0  0
   13.3267    1.7941    0.0000 Cl  0  5  0  0  0  0  0  0  0  0  0  0
   12.3168   -5.1031    0.0000 Cl  0  5  0  0  0  0  0  0  0  0  0  0
    8.8790   -4.7163    0.0000 Cl  0  5  0  0  0  0  0  0  0  0  0  0
    5.5056   -6.0485    0.0000 Cl  0  5  0  0  0  0  0  0  0  0  0  0
    0.1133    0.8429    0.0000 O   0  0  0  0  0  0  0  0  0  0  0  0
    0.8278    0.4304    0.0000 C   0  0  0  0  0  0  0  0  0  0  0  0
    1.5422    0.8429    0.0000 C   0  0  0  0  0  0  0  0  0  0  0  0
    2.2567    0.4304    0.0000 C   0  0  0  0  0  0  0  0  0  0  0  0
    2.9712    0.8429    0.0000 C   0  0  0  0  0  0  0  0  0  0  0  0
    3.6856    0.4304    0.0000 N   0  0  0  0  0  0  0  0  0  0  0  0
    4.4001    0.8429    0.0000 C   0  0  0  0  0  0  0  0  0  0  0  0
    5.1146    0.4304    0.0000 C   0  0  0  0  0  0  0  0  0  0  0  0
    5.8291    0.8429    0.0000 C   0  0  0  0  0  0  0  0  0  0  0  0
    6.5435    0.4304    0.0000 N   0  3  0  0  0  0  0  0  0  0  0  0
    7.2580    0.8429    0.0000 C   0  0  0  0  0  0  0  0  0  0  0  0
    7.9725    0.4304    0.0000 C   0  0  0  0  0  0  0  0  0  0  0  0
    8.6869    0.8429    0.0000 C   0  0  0  0  0  0  0  0  0  0  0  0
    9.4014    0.4304    0.0000 C   0  0  0  0  0  0  0  0  0  0  0  0
   10.1159    0.8429    0.0000 N   0  3  0  0  0  0  0  0  0  0  0  0
   10.8304    0.4304    0.0000 C   0  0  0  0  0  0  0  0  0  0  0  0
   11.5448    0.8429    0.0000 C   0  0  0  0  0  0  0  0  0  0  0  0
   12.2593    0.4304    0.0000 C   0  0  0  0  0  0  0  0  0  0  0  0
   12.9738    0.8429    0.0000 N   0  3  0  0  0  0  0  0  0  0  0  0
    2.9712    1.6651    0.0000 O   0  0  0  0  0  0  0  0  0  0  0  0
   -2.0605    0.3845    0.0000 C   0  0  0  0  0  0  0  0  0  0  0  0
   -2.0605   -0.4405    0.0000 C   0  0  0  0  0  0  0  0  0  0  0  0
   -1.3461   -0.8530    0.0000 C   0  0  0  0  0  0  0  0  0  0  0  0
   -0.6316   -0.4405    0.0000 C   0  0  0  0  0  0  0  0  0  0  0  0
   -0.6316    0.3845    0.0000 C   0  0  0  0  0  0  0  0  0  0  0  0
   -1.3461    0.7970    0.0000 C   0  0  0  0  0  0  0  0  0  0  0  0
    0.0805   -0.8516    0.0000 O   0  0  0  0  0  0  0  0  0  0  0  0
    0.7926   -0.4405    0.0000 C   0  0  0  0  0  0  0  0  0  0  0  0
   -2.7726   -0.8516    0.0000 C   0  0  0  0  0  0  0  0  0  0  0  0
   -3.4847   -0.4405    0.0000 O   0  0  0  0  0  0  0  0  0  0  0  0
   -2.7726   -1.6738    0.0000 C   0  0  0  0  0  0  0  0  0  0  0  0
  -13.3267   -0.8316    0.0000 C   0  0  0  0  0  0  0  0  0  0  0  0
  -13.3267   -1.6566    0.0000 C   0  0  0  0  0  0  0  0  0  0  0  0
  -12.6123   -2.0691    0.0000 C   0  0  0  0  0  0  0  0  0  0  0  0
  -11.8978   -1.6566    0.0000 C   0  0  0  0  0  0  0  0  0  0  0  0
  -11.8978   -0.8316    0.0000 C   0  0  0  0  0  0  0  0  0  0  0  0
  -12.6123   -0.4191    0.0000 C   0  0  0  0  0  0  0  0  0  0  0  0
  -11.1857   -0.4205    0.0000 C   0  0  0  0  0  0  0  0  0  0  0  0
  -10.4736   -0.8316    0.0000 O   0  0  0  0  0  0  0  0  0  0  0  0
   -9.7616   -0.4205    0.0000 C   0  0  0  0  0  0  0  0  0  0  0  0
   -8.7487   -0.9605    0.0000 N   0  0  0  0  0  0  0  0  0  0  0  0
   -9.7616    0.4017    0.0000 O   0  0  0  0  0  0  0  0  0  0  0  0
   -7.8218   -0.4635    0.0000 C   0  0  0  0  0  0  0  0  0  0  0  0
   -7.8218   -1.2885    0.0000 C   0  0  0  0  0  0  0  0  0  0  0  0
   -7.8218    0.3615    0.0000 C   0  0  0  0  0  0  0  0  0  0  0  0
   -7.1073   -0.8760    0.0000 C   0  0  0  0  0  0  0  0  0  0  0  0
   -6.9167    0.8200    0.0000 O   0  0  0  0  0  0  0  0  0  0  0  0
   -6.3952   -0.4648    0.0000 O   0  0  0  0  0  0  0  0  0  0  0  0
   -6.9566   -1.8471    0.0000 O   0  0  0  0  0  0  0  0  0  0  0  0
   -6.5692    1.5652    0.0000 C   0  0  0  0  0  0  0  0  0  0  0  0
   -5.7501    1.6368    0.0000 C   0  0  0  0  0  0  0  0  0  0  0  0
   -5.4026    2.3820    0.0000 C   0  0  0  0  0  0  0  0  0  0  0  0
   -5.6832   -0.8760    0.0000 C   0  0  0  0  0  0  0  0  0  0  0  0
   -4.9711   -0.4648    0.0000 C   0  0  0  0  0  0  0  0  0  0  0  0
   -4.2590   -0.8760    0.0000 C   0  0  0  0  0  0  0  0  0  0  0  0
   -6.5455   -2.5592    0.0000 C   0  0  0  0  0  0  0  0  0  0  0  0
   -5.7232   -2.5592    0.0000 C   0  0  0  0  0  0  0  0  0  0  0  0
   -5.3121   -3.2712    0.0000 C   0  0  0  0  0  0  0  0  0  0  0  0
   -4.5836    2.4537    0.0000 O   0  0  0  0  0  0  0  0  0  0  0  0
   -5.8743    3.0555    0.0000 O   0  0  0  0  0  0  0  0  0  0  0  0
   -4.2590   -1.6982    0.0000 O   0  0  0  0  0  0  0  0  0  0  0  0
   -4.4899   -3.2712    0.0000 O   0  0  0  0  0  0  0  0  0  0  0  0
   -5.7232   -3.9833    0.0000 O   0  0  0  0  0  0  0  0  0  0  0  0
   -1.0574    4.0364    0.0000 O   0  0  0  0  0  0  0  0  0  0  0  0
   -0.3097    3.6878    0.0000 C   0  0  0  0  0  0  0  0  0  0  0  0
    0.3661    4.1610    0.0000 C   0  0  0  0  0  0  0  0  0  0  0  0
    1.1138    3.8123    0.0000 C   0  0  0  0  0  0  0  0  0  0  0  0
    1.7896    4.2855    0.0000 C   0  0  0  0  0  0  0  0  0  0  0  0
    2.5373    3.9368    0.0000 N   0  0  0  0  0  0  0  0  0  0  0  0
    3.2131    4.4100    0.0000 C   0  0  0  0  0  0  0  0  0  0  0  0
    3.9608    4.0614    0.0000 C   0  0  0  0  0  0  0  0  0  0  0  0
    4.6366    4.5346    0.0000 C   0  0  0  0  0  0  0  0  0  0  0  0
    5.3843    4.1859    0.0000 N   0  3  0  0  0  0  0  0  0  0  0  0
    6.0601    4.6591    0.0000 C   0  0  0  0  0  0  0  0  0  0  0  0
    6.8078    4.3105    0.0000 C   0  0  0  0  0  0  0  0  0  0  0  0
    7.4836    4.7837    0.0000 C   0  0  0  0  0  0  0  0  0  0  0  0
    8.2313    4.4350    0.0000 C   0  0  0  0  0  0  0  0  0  0  0  0
    8.9071    4.9082    0.0000 N   0  3  0  0  0  0  0  0  0  0  0  0
    9.6548    4.5595    0.0000 C   0  0  0  0  0  0  0  0  0  0  0  0
   10.3306    5.0327    0.0000 C   0  0  0  0  0  0  0  0  0  0  0  0
   11.0783    4.6841    0.0000 C   0  0  0  0  0  0  0  0  0  0  0  0
   11.7542    5.1573    0.0000 N   0  3  0  0  0  0  0  0  0  0  0  0
    1.7180    5.1046    0.0000 O   0  0  0  0  0  0  0  0  0  0  0  0
   -3.1830    3.3903    0.0000 C   0  0  0  0  0  0  0  0  0  0  0  0
   -3.1111    2.5685    0.0000 C   0  0  0  0  0  0  0  0  0  0  0  0
   -2.3634    2.2198    0.0000 C   0  0  0  0  0  0  0  0  0  0  0  0
   -1.6876    2.6930    0.0000 C   0  0  0  0  0  0  0  0  0  0  0  0
   -1.7595    3.5149    0.0000 C   0  0  0  0  0  0  0  0  0  0  0  0
   -2.5072    3.8635    0.0000 C   0  0  0  0  0  0  0  0  0  0  0  0
   -0.9424    2.3455    0.0000 O   0  0  0  0  0  0  0  0  0  0  0  0
   -0.2689    2.8171    0.0000 C   0  0  0  0  0  0  0  0  0  0  0  0
   -3.7846    2.0968    0.0000 C   0  0  0  0  0  0  0  0  0  0  0  0
   -3.7129    1.4711    0.0000 C   0  0  0  0  0  0  0  0  0  0  0  0
   -0.9031   -4.9009    0.0000 O   0  0  0  0  0  0  0  0  0  0  0  0
   -0.1554   -4.5523    0.0000 C   0  0  0  0  0  0  0  0  0  0  0  0
    0.5204   -5.0255    0.0000 C   0  0  0  0  0  0  0  0  0  0  0  0
    1.2681   -4.6768    0.0000 C   0  0  0  0  0  0  0  0  0  0  0  0
    1.9439   -5.1500    0.0000 C   0  0  0  0  0  0  0  0  0  0  0  0
    2.6916   -4.8014    0.0000 N   0  0  0  0  0  0  0  0  0  0  0  0
    3.3674   -5.2746    0.0000 C   0  0  0  0  0  0  0  0  0  0  0  0
    4.1151   -4.9259    0.0000 C   0  0  0  0  0  0  0  0  0  0  0  0
    4.7909   -5.3991    0.0000 C   0  0  0  0  0  0  0  0  0  0  0  0
    5.5386   -5.0504    0.0000 N   0  3  0  0  0  0  0  0  0  0  0  0
    6.2144   -5.5236    0.0000 C   0  0  0  0  0  0  0  0  0  0  0  0
    6.9621   -5.1750    0.0000 C   0  0  0  0  0  0  0  0  0  0  0  0
    7.6379   -5.6482    0.0000 C   0  0  0  0  0  0  0  0  0  0  0  0
    8.3856   -5.2995    0.0000 C   0  0  0  0  0  0  0  0  0  0  0  0
    9.0614   -5.7727    0.0000 N   0  3  0  0  0  0  0  0  0  0  0  0
    9.8091   -5.4241    0.0000 C   0  0  0  0  0  0  0  0  0  0  0  0
   10.4849   -5.8973    0.0000 C   0  0  0  0  0  0  0  0  0  0  0  0
   11.2326   -5.5486    0.0000 C   0  0  0  0  0  0  0  0  0  0  0  0
   11.9084   -6.0218    0.0000 N   0  3  0  0  0  0  0  0  0  0  0  0
    1.8722   -5.9691    0.0000 O   0  0  0  0  0  0  0  0  0  0  0  0
   -3.0287   -4.2548    0.0000 C   0  0  0  0  0  0  0  0  0  0  0  0
   -2.9568   -3.4330    0.0000 C   0  0  0  0  0  0  0  0  0  0  0  0
   -2.2091   -3.0843    0.0000 C   0  0  0  0  0  0  0  0  0  0  0  0
   -1.5333   -3.5575    0.0000 C   0  0  0  0  0  0  0  0  0  0  0  0
   -1.6052   -4.3794    0.0000 C   0  0  0  0  0  0  0  0  0  0  0  0
   -2.3529   -4.7280    0.0000 C   0  0  0  0  0  0  0  0  0  0  0  0
   -0.7881   -3.2100    0.0000 O   0  0  0  0  0  0  0  0  0  0  0  0
   -0.1146   -3.6816    0.0000 C   0  0  0  0  0  0  0  0  0  0  0  0
   -3.6303   -2.9614    0.0000 C   0  0  0  0  0  0  0  0  0  0  0  0
   -3.5587   -2.1423    0.0000 C   0  0  0  0  0  0  0  0  0  0  0  0
   -3.9282    3.7378    0.0000 N   0  3  0  0  0  0  0  0  0  0  0  0
   -3.9998    4.5569    0.0000 O   0  0  0  0  0  0  0  0  0  0  0  0
   -4.6017    3.2662    0.0000 O   0  5  0  0  0  0  0  0  0  0  0  0
   -2.8800    0.6882    0.0000 N   0  3  0  0  0  0  0  0  0  0  0  0
   -3.0181    1.4987    0.0000 O   0  0  0  0  0  0  0  0  0  0  0  0
   -3.5129    0.1633    0.0000 O   0  5  0  0  0  0  0  0  0  0  0  0
   -3.7739   -4.6023    0.0000 N   0  3  0  0  0  0  0  0  0  0  0  0
   -3.8456   -5.4214    0.0000 O   0  0  0  0  0  0  0  0  0  0  0  0
   -4.4474   -4.1307    0.0000 O   0  5  0  0  0  0  0  0  0  0  0  0
 10 11  1  0      
 11 12  1  0      
 12 13  1  0      
 13 14  1  0      
 14 15  1  0      
 15 16  1  0      
 16 17  1  0      
 17 18  1  0      
 18 19  1  0      
 19 20  1  0      
 20 21  1  0      
 21 22  1  0      
 22 23  1  0      
 23 24  1  0      
 24 25  1  0      
 25 26  1  0      
 26 27  1  0      
 27 28  1  0      
 14 29  2  0      
 30 31  2  0      
 31 32  1  0      
 32 33  2  0      
 33 34  1  0      
 34 35  2  0      
 35 30  1  0      
 10 34  1  0      
 33 36  1  0      
 36 37  1  0      
 31 38  1  0      
 38 39  1  0      
 38 40  1  0      
 30136  1  0      
 41 42  2  0      
 42 43  1  0      
 43 44  2  0      
 44 45  1  0      
 45 46  2  0      
 46 41  1  0      
 45 47  1  0      
 47 48  1  0      
 48 49  1  0      
 49 50  1  0      
 49 51  2  0      
 50 52  1  0      
 52 53  1  0      
 52 54  1  0      
 52 55  1  0      
 54 56  1  0      
 55 57  1  0      
 53 58  1  0      
 56 59  1  0      
 59 60  1  0      
 60 61  1  0      
 57 62  1  0      
 62 63  1  0      
 63 64  1  0      
 58 65  1  0      
 65 66  1  0      
 66 67  1  0      
 61 68  1  0      
 61 69  2  0      
 64 70  2  0      
 67 71  1  0      
 67 72  2  0      
 64 39  1  0      
 73 74  1  0      
 74 75  1  0      
 75 76  1  0      
 76 77  1  0      
 77 78  1  0      
 78 79  1  0      
 79 80  1  0      
 80 81  1  0      
 81 82  1  0      
 82 83  1  0      
 83 84  1  0      
 84 85  1  0      
 85 86  1  0      
 86 87  1  0      
 87 88  1  0      
 88 89  1  0      
 89 90  1  0      
 90 91  1  0      
 77 92  2  0      
 93 94  2  0      
 94 95  1  0      
 95 96  2  0      
 96 97  1  0      
 97 98  2  0      
 98 93  1  0      
 73 97  1  0      
 96 99  1  0      
 99100  1  0      
 94101  1  0      
101102  1  0      
 93133  1  0      
101 68  1  0      
103104  1  0      
104105  1  0      
105106  1  0      
106107  1  0      
107108  1  0      
108109  1  0      
109110  1  0      
110111  1  0      
111112  1  0      
112113  1  0      
113114  1  0      
114115  1  0      
115116  1  0      
116117  1  0      
117118  1  0      
118119  1  0      
119120  1  0      
120121  1  0      
107122  2  0      
123124  2  0      
124125  1  0      
125126  2  0      
126127  1  0      
127128  2  0      
128123  1  0      
103127  1  0      
126129  1  0      
129130  1  0      
124131  1  0      
131132  1  0      
123139  1  0      
131 71  1  0      
133134  2  0      
133135  1  0      
136137  2  0      
136138  1  0      
139140  2  0      
139141  1  0      
M  CHG  8   1  -1   2  -1   3  -1   4  -1   5  -1   6  -1   7  -1   8  -1
M  CHG  8   9  -1  19   1  24   1  28   1  82   1  87   1  91   1 112   1
M  CHG  8 117   1 121   1 133   1 135  -1 136   1 138  -1 139   1 141  -1
M  END
